# Supplementary material for: A highly stable Zn9-pyrazolate metal–organic framework with metallosalen ligands as a carbon dioxide cycloaddition catalyst
Source: Royal Society of Chemistry journal article supplement (doi:10.1039/d1qi01555a), 2022-01-01
Supplement: d1qi01555a1.pdf [file d1qi01555a1.pdf]

Supplementary Materials  
for  
**A Highly Stable Zn<sub>9</sub>-Pyrazolate Metal-Organic Framework with  
Metallosalen Ligands as Carbon Dioxide Cycloaddition Catalyst**

Fa-Xue Ma<sup>a,b</sup>, Fu-Qi Mi<sup>b</sup>, Meng-Jiao Sun<sup>b,c</sup>, Tao Huang<sup>b</sup>, Zi-An Wang<sup>b</sup>, Teng  
Zhang<sup>b, c\*</sup> and Rong Cao<sup>a, b, c\*</sup>

<sup>a</sup> College of Chemistry and Chemical Engineering, Xiamen University, Xiamen  
361005, China

<sup>b</sup> State Key Laboratory of Structural Chemistry, Fujian Institute of Research on the  
Structure of Matter, Chinese Academy of Sciences, Fuzhou 350002, China

<sup>c</sup> University of the Chinese Academy of Sciences, Beijing 100049, China

## **1. Reagents and Apparatus**

All chemicals and reagents were used as received from commercial sources without further purification. Powder X-ray diffraction (PXRD) patterns were recorded on a Miniflex 600 diffractometer using Cu K $\alpha$  radiation ( $\lambda = 0.154$  nm). SEM images were taken with an SU-8010 field emission scanning electron microscope with the secondary electron imaging resolution  $\leq 1$  nm (15 kV, XWD  $\geq 4$  mm) or  $\leq 1.3$  nm (1 kV). N<sub>2</sub> sorption isotherms were measured by a Micromeritics ASAP 2460 instrument. CO<sub>2</sub> sorption isotherms were measured by a Micromeritics ASAP 2020 instrument. X-ray photoelectron spectroscopy (XPS) measurements were performed on an ESCALAB 250Xi X-ray photoelectron spectrometer (Thermo Fisher) using an Al K $\alpha$  source (15 kV, 10 mA). The static contact angle (CA) was measured with a contact angle measuring instrument JC2000D. Inductively Coupled Plasma Optical Emission spectrometric (ICP-OES) measurements for quantification of Zn and Ni contents were conducted with a HORIBA Jobin Yvon Ultima2. Thermogravimetric analyses (TG) was conducted with a Netzsch STA449F3 instrument with an Al<sub>2</sub>O<sub>3</sub> crucible at a heating rate of 10 °C/min under nitrogen atmosphere. The enantiomeric excess test of styrene carbonate was determined by chiral HPLC analysis using an Agilent 1150 HPLC.

## **2. Synthesis of the ligand and MOF.**

The H<sub>2</sub>L ligand was synthesized following the route in Scheme S1.

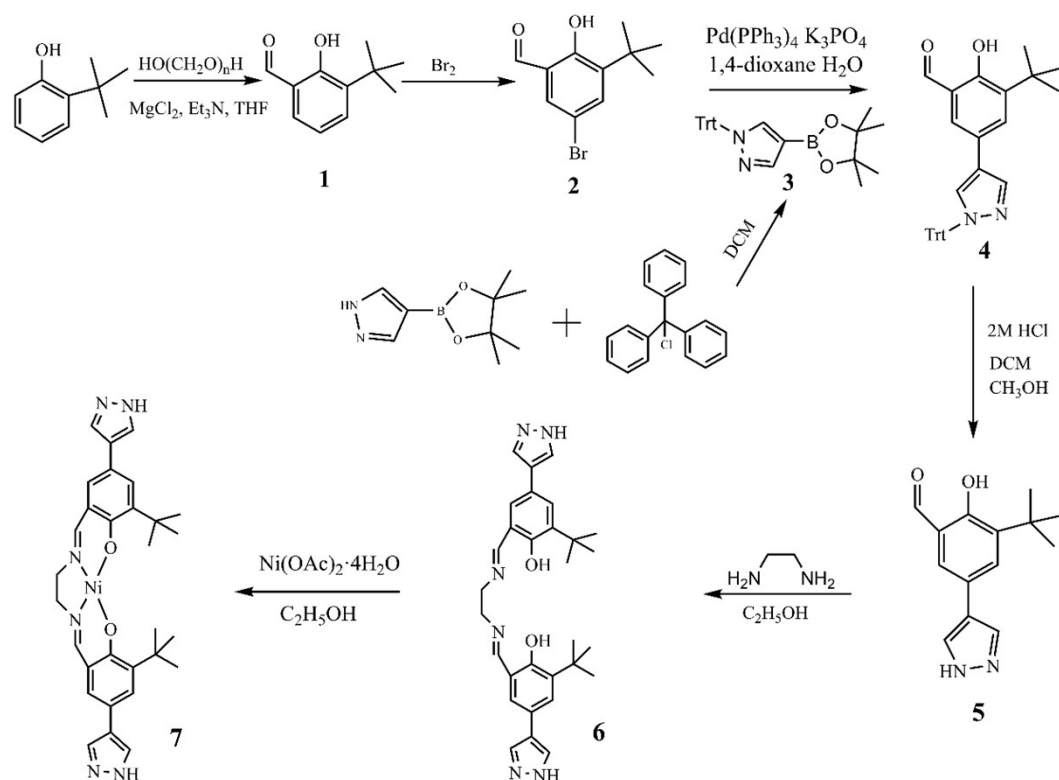

**Scheme S1.** Synthesis of H<sub>2</sub>L (**7**) Ligand.

**3-(tert-butyl)-2-hydroxybenzaldehyde (1).** Anhydrous magnesium dichloride (4.76 g, 50 mmol), 2-tert-butylphenol (3.76 g, 25 mmol), paraformaldehyde (2.25 g, 75 mmol) and anhydrous tetrahydrofuran (120 mL) were added subsequently to a dry, nitrogen-protected, 250 mL three-neck round-bottom flask with a slight positive pressure maintained over the addition process. Triethylamine (5.06 g, 50 mmol) was added dropwise by syringe when the mixture was stirred vigorously. After addition, the mixture was heated to 75 °C for 4 h, which turned bright light-yellow color. After cooling down, 100 mL of ether was added to the reaction mixture, which was subsequently washed with 1N HCl (aq) (3 × 50 mL) and water (3 × 50 mL). The organic layer was dried over anhydrous MgSO<sub>4</sub> and the solvent removed on rotavapor. The resulting crude product was purified by column chromatography (10% EtOAc/PE) to give **1** as a yellow oil (3.78 g, 85%). <sup>1</sup>H NMR (400 MHz, CDCl<sub>3</sub>) δ 11.79 (s, 1H), 9.88 (s, 1H), 7.53 (dd, *J* = 7.7, 1.5 Hz, 1H), 7.40 (dd, *J* = 7.6, 1.6 Hz, 1H), 6.95 (dd, *J* = 9.5, 5.9 Hz, 1H), 1.43 (s, 9H).

**5-Bromo-3-tert-butyl-2-hydroxybenzaldehyde (2).** Compound **2** was synthesized according to literature procedure.<sup>1</sup> To a solution of compound **1** (5.0 g, 28.0 mmol) in 20 mL dichloromethane (DCM) at 0 °C was added dropwise a solution of Br<sub>2</sub> (1.45 mL, 28.0 mmol) in DCM (15 mL) over a period of 30 min. After the addition was complete,

the mixture was stirred for an additional 1 h before the organic volatiles were removed under reduced pressure. The crude product was purified by column chromatography (5% EtOAc/PE) to yield **2** as yellowish solid (7.00 g, 97 %). <sup>1</sup>H NMR (400 MHz, CDCl<sub>3</sub>) δ 11.73 (s, 1H), 9.81 (s, 1H), 7.58 (d, *J* = 2.4 Hz, 1H), 7.52 (d, *J* = 2.5 Hz, 1H), 1.40 (s, 9H).

**4-(4,4,5,5-Tetramethyl-1,3,2-dioxaborolan-2-yl)-1-trityl-pyrazole (3).** Compound **3** was synthesized according to literature procedure.<sup>2</sup> 4-(4,4,5,5-Tetramethyl-1,3,2-dioxaborolan-2-yl)-1H-pyrazole (8.0 g, 41.2 mmol) was dissolved in 80 mL of DCM and the mixture was added to a dried 200 mL three-neck round bottom flask equipped with a stirring bar and a reflux condenser. Et<sub>3</sub>N (8.0 mL) was then added dropwise to the reaction mixture. The mixture was heated to reflux, and cautiously stirred for 30 min to give a clear colorless solution. Tritylchloride (11.2 g, 40.4 mmol) was added to the solution and the reaction was proceeded for another 2 h. The reaction mixture was then cooled to room temperature, poured over 100 mL of ice water and extracted with DCM (3 × 100 mL). The organic layer was collected and dried over anhydrous MgSO<sub>4</sub>. The solvents were removed by rotary evaporation to give compound **3** (16.18 g, 90.0%). <sup>1</sup>H NMR (400 MHz, CDCl<sub>3</sub>): δ 7.69 (s, 1H), 7.43 (s, 1H), 7.32 (m, 9H), 7.14 (m, 6H), 1.20 (s, 12H).

**3-(tert-butyl)-2-hydroxy-5-(1-trityl-1H-pyrazol-4-yl)benzaldehyde (4).** Compound **2** (7.2 g, 28 mmol) and compound **3** (15.3 g, 35 mmol) were dissolved in 200 mL of 1,4-dioxane and 20 ml H<sub>2</sub>O, and the solution was degassed with nitrogen for 15 min. PPh<sub>3</sub> (0.33 g, 1.25 mmol), Pd(PPh<sub>3</sub>)<sub>4</sub> (1.45 g, 1.25 mmol) and K<sub>3</sub>PO<sub>4</sub> (5.84 g, 27.5 mmol) were then added to the solution with a slight positive pressure of nitrogen maintained. The mixture was heated to reflux for 3 days under nitrogen atmosphere. After that, the reaction mixture was cooled to room temperature. The resulting mixture was extracted with DCM (5 × 100 mL), and the organic layer was collected, dried over anhydrous MgSO<sub>4</sub> and concentrated on a rotavapor. The crude product was purified by column chromatography (15% EtOAc/PE) to yield **4** (9.13g, 67%) as a yellow solid. <sup>1</sup>H NMR (400 MHz, CDCl<sub>3</sub>): δ 11.70 (s, 1H), 9.85 (s, 1H), 7.89 (s, 1H), 7.59 – 7.55 (m, 2H), 7.40 (d, *J* = 2.2 Hz, 1H), 7.36 – 7.31 (m, 9H), 7.21 (dt, *J* = 6.7, 3.9 Hz, 6H), 1.42 (s, 9H).

**3-(tert-butyl)-2-hydroxy-5-(1H-pyrazol-4-yl)benzaldehyde (5).** Compound **4** (486.62 mg, 1 mmol) was suspended in 15 mL of DCM/MeOH (1:1) mixed solvent. 5 ml of 2 N HCl (aq) was slowly added to the suspension, and the resulting mixture was

stirred at 45 °C for 6 h. The reaction mixture was then cooled down, neutralized by  $\text{NH}_4\text{OH}$  to  $\text{pH} = 7$ , and extracted with DCM ( $3 \times 50 \text{ mL}$ ). The organic layer was collected and dried with anhydrous  $\text{MgSO}_4$ , then concentrated in vacuo. The solid residue was dissolved in a small amount of DCM and purified by column chromatography (DCM to DCM/MeOH 10:1) to yield **5** (219.9 mg, 90%) as a yellow solid.  $^1\text{H NMR}$  (400 MHz,  $\text{CDCl}_3$ )  $\delta$  11.73 (br s, 1H), 9.92 (s, 1H), 7.85 (s, 2H), 7.65 (d,  $J = 2.0 \text{ Hz}$ , 1H), 7.50 (d,  $J = 2.0 \text{ Hz}$ , 1H), 1.46 (s, 9H).

**6,6'-((1E,1'E)-(ethane-1,2-diylbis(azaneylylidene))bis(methaneylylidene))bis(2-(tert-butyl)-4-(1H-pyrazol-4-yl)phenol) (6)**. Compound **5** (0.489 g, 2 mmol) was dissolved in 125 mL of ethanol and heated to reflux with stirring for an hour. Ethylenediamine (140  $\mu\text{L}$ , 1 mmol) was added to the solution in a dropwise fashion, and the resulting mixture was heated for another 4 h. After reaction, the solvent was removed by filtrating and the product **6** (487 mg, 0.95 mmol, 95%) was obtained as yellow solid.  $^1\text{H NMR}$  (400 MHz,  $\text{DMSO-}d_6$ )  $\delta$  14.16 (s, 1H), 12.84 (s, 1H), 8.61 (s, 1H), 8.03 (s, 1H), 7.79 (s, 1H), 7.48 (d,  $J = 2.0 \text{ Hz}$ , 1H), 7.44 (d,  $J = 2.0 \text{ Hz}$ , 1H), 3.96 (s, 2H), 1.39 (s, 9H).

**H<sub>2</sub>L (7)**. A solution of compound **6** (512.66 mg, 1 mmol) in 100 ml ethanol was heated to reflux for an hour.  $\text{Ni}(\text{OAc})_2 \cdot 6\text{H}_2\text{O}$  (290 mg, 1 mmol) was added to the solution and the reaction mixture was refluxed for another 4 h. After reaction, the mixture was cooled to room temperature and filtrated to give **7** (518 mg, 0.91 mmol, 91%) as dark yellow solid.  $^1\text{H NMR}$  (400 MHz,  $\text{DMSO-}d_6$ )  $\delta$  12.77 (s, 1H), 7.88 (s, 2H), 7.75 (br s, 1H), 7.32 (d,  $J = 4.0 \text{ Hz}$ , 2H), 3.42 (s, 2H), 1.36 (s, 9H).

**Zn<sub>9</sub>O<sub>2</sub>(OH)<sub>2</sub>(L)<sub>6</sub>**. Compound **H<sub>2</sub>L** (15 mg) and  $\text{Zn}(\text{OAc})_2 \cdot 6\text{H}_2\text{O}$  (90 mg) were dissolved in 15 mL  $\text{DMF}/\text{H}_2\text{O}$  ( $v:v = 3:2$ ) mix solvent and sealed in a 20 ml glass bottle and then heated at 110°C for 72 h in an oven. The dark red octahedral crystals of **Zn<sub>9</sub>O<sub>2</sub>(OH)<sub>2</sub>(L)<sub>6</sub>** were collected by filtration after cooling down, washed with DMF,  $\text{H}_2\text{O}$ , and EtOH subsequently, and dried in air (yield: 70% based on **H<sub>2</sub>L**).

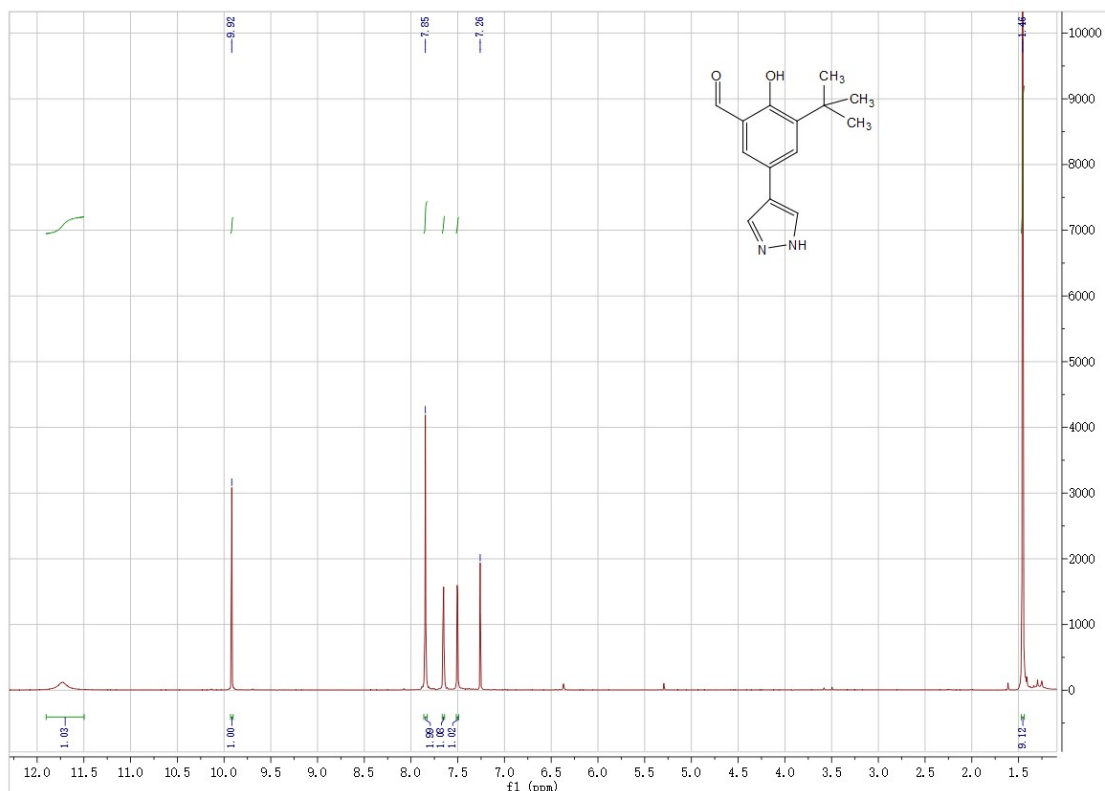

Figure S1.  $^1\text{H}$  NMR (400 MHz,  $\text{CDCl}_3$ ) of compound 5.

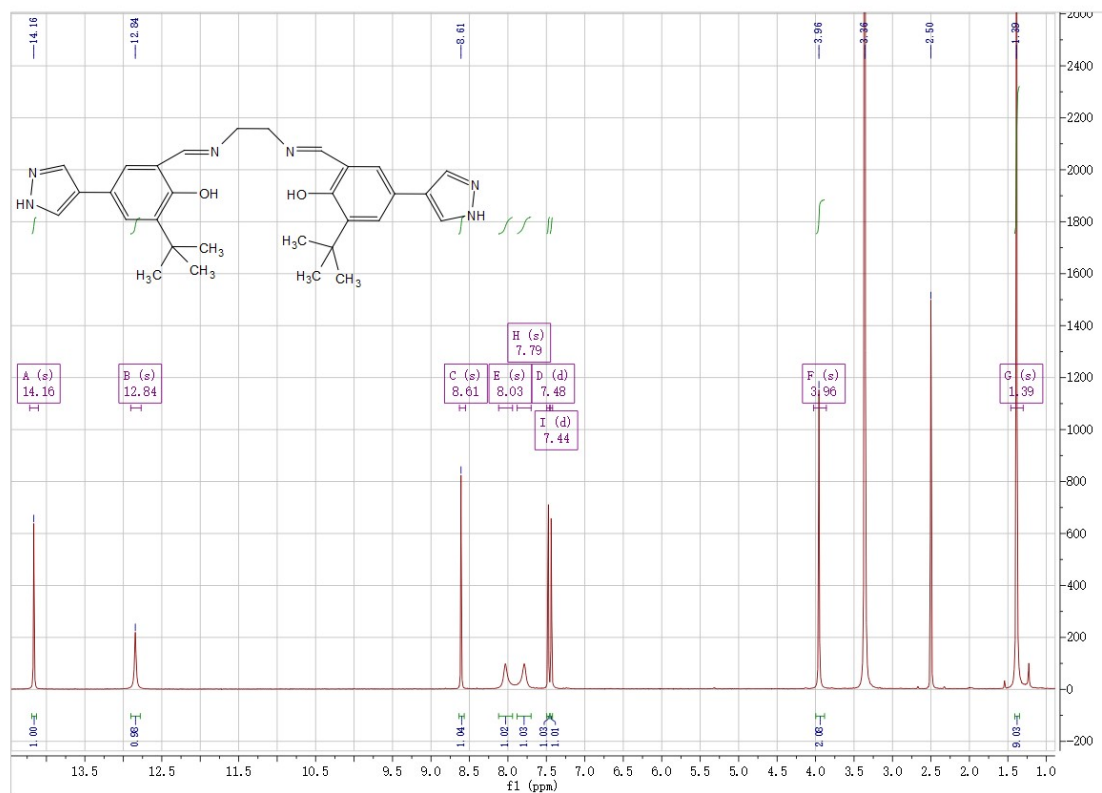

Figure S2.  $^1\text{H}$  NMR (400 MHz,  $\text{DMSO}-d_6$ ) of compound 6.

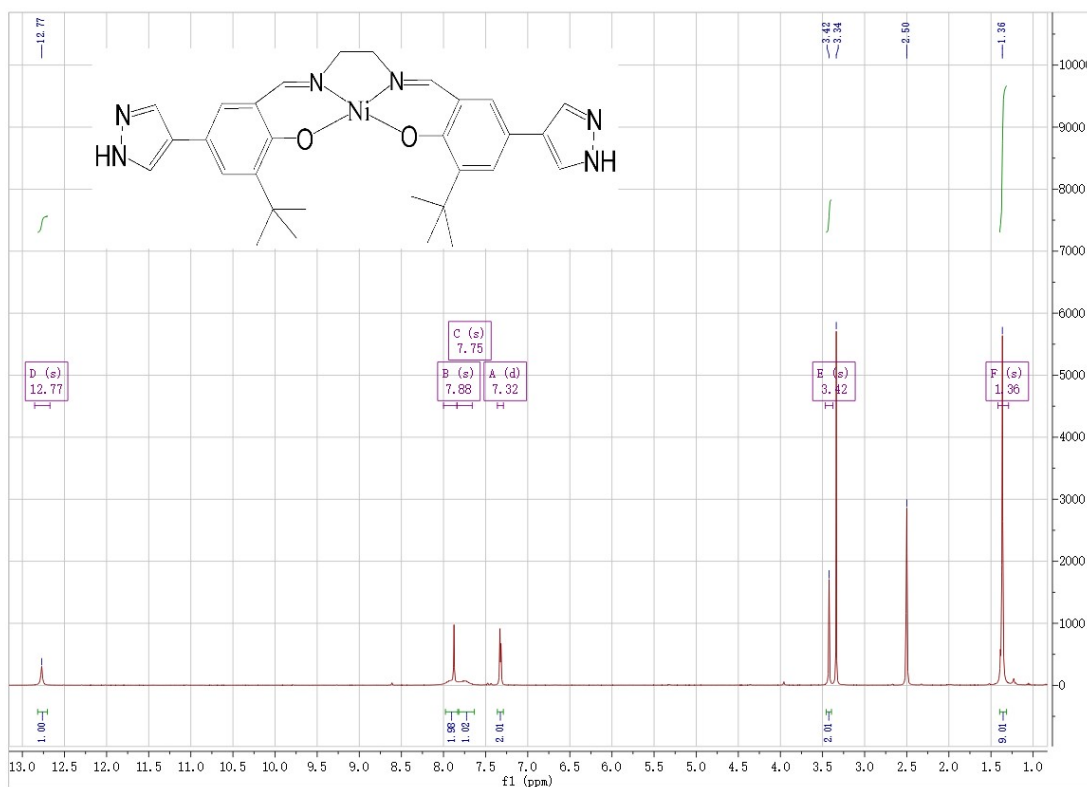

**Figure S3.**  $^1\text{H}$  NMR (400 MHz,  $\text{DMSO-}d_6$ ) of compound **7** ( $\text{H}_2\text{L}$ ).

### 3. Single crystal X-ray crystallography.

Single crystal X-ray diffraction of MOF was performed with a BRUKER D8 VENTURE equipped with  $\text{Cu-K}\alpha$  radiation ( $\lambda = 0.154 \text{ nm}$ ) at room temperature. The frames were integrated with the Bruker SAINT© build in APEX III software package using a narrow-frame integration algorithm, which also corrects for the Lorentz and polarization effects. Absorption corrections were applied using SADABS. Structures were solved by intrinsic phasing and refined to convergence by least squares method on  $F^2$  using the SHELX-2019 software suite. Scattering from the highly disorder guest molecules was modelled by the SQUEEZE program in PLATON software suite.<sup>3,4</sup> All non-hydrogen atoms are refined anisotropically.

**Table S1.** Crystallographic data of  $\text{Zn}_9\text{O}_2(\text{OH})_2(\text{L})_6$

| Name              | $\text{Zn}_9\text{O}_2(\text{OH})_2(\text{L})_6$                               |
|-------------------|--------------------------------------------------------------------------------|
| Empirical Formula | $\text{C}_{180}\text{H}_{192}\text{N}_{36}\text{Ni}_6\text{O}_{16}\text{Zn}_9$ |
| Formula weight    | 4056.27                                                                        |
| Temperature (K)   | 293(2)                                                                         |
| Crystal system    | cubic                                                                          |
| Space group       | $F\bar{4}32$                                                                   |
| $a$ (Å)           | 37.2420(3)                                                                     |

|                                       |                                                |
|---------------------------------------|------------------------------------------------|
| $b$ (Å)                               | 37.2420(3)                                     |
| $c$ (Å)                               | 37.2420(3)                                     |
| $\alpha$ (°)                          | 90                                             |
| $\beta$ (°)                           | 90                                             |
| $\gamma$ (°)                          | 90                                             |
| $V$ (Å <sup>3</sup> )                 | 51653.4(12)                                    |
| $Z$                                   | 8                                              |
| Density (calcd. g/cm <sup>3</sup> )   | 1.043                                          |
| Wavelength (Å)                        | 1.54178                                        |
| Absorption coeff. (mm <sup>-1</sup> ) | 1.74                                           |
| F(000)                                | 16720                                          |
| $\theta$ range data collection        | 3.937–72.506°                                  |
| Limiting indices                      | -46 ≤ $h$ ≤ 43, -42 ≤ $k$ ≤ 41, -45 ≤ $l$ ≤ 36 |
| Reflection collected                  | 32411                                          |
| Independent reflections               | 4271                                           |
| R(int)                                | 0.0798                                         |
| Data/restraints/parameters            | 4271/0/196                                     |
| Goodness-of-fit on $F^2$              | 1.555                                          |
| Final R indices [ $I > 2\sigma(I)$ ]  | $R_1 = 0.1324$ , $wR_2 = 0.3696$               |
| R indices (all data)                  | $R_1 = 0.1609$ , $wR_2 = 0.4030$               |

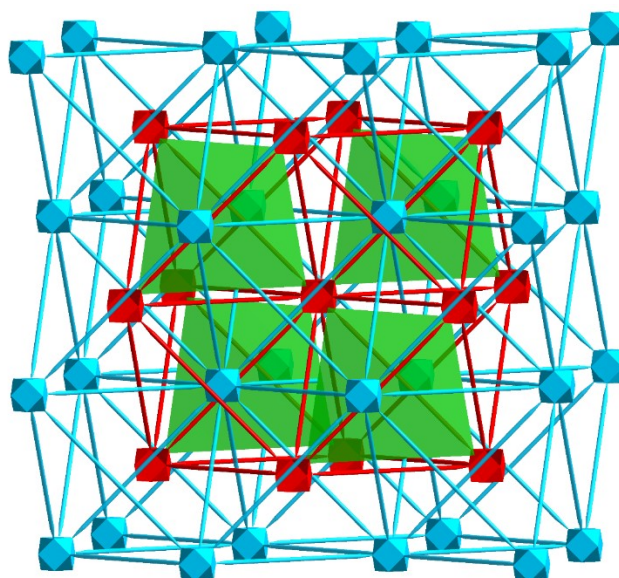

**Figure S4.** The  $Zn_9$  cluster of one network locates in the tetrahedral cavity formed by the other network with 50% occupancy.

#### 4. Characterization of the MOF.



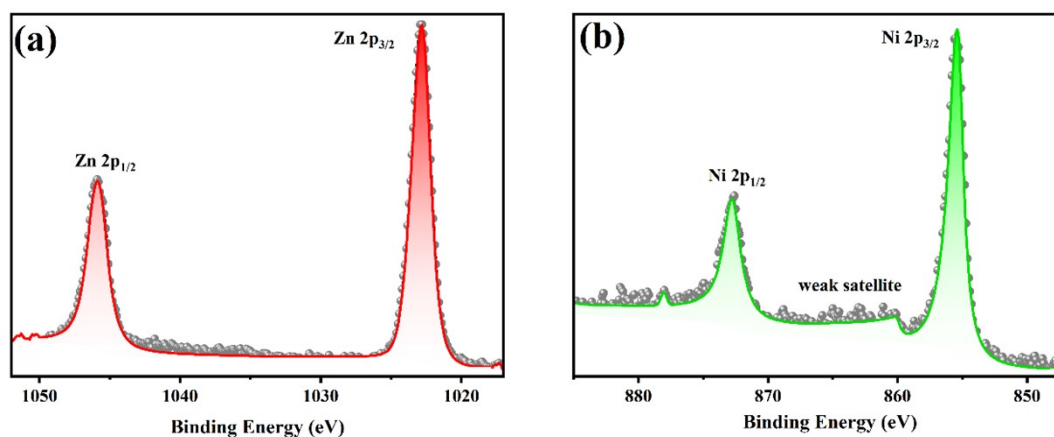

Figure S5. (a) Zn 2p and (b) Ni 2p XPS spectra of the MOF.

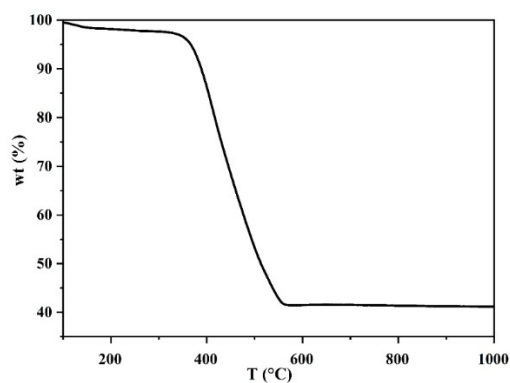

Figure S6. Thermogravimetric curves of Zn<sub>9</sub>O<sub>2</sub>(OH)<sub>2</sub>(L)<sub>6</sub>

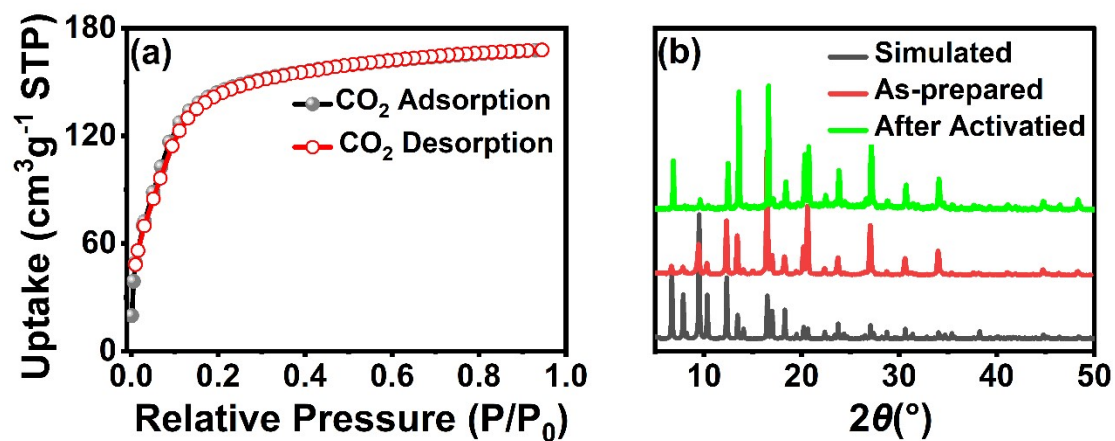

Figure S7. (a) CO<sub>2</sub> sorption isotherms of Zn<sub>9</sub>O<sub>2</sub>(OH)<sub>2</sub>(L)<sub>6</sub> at 195 K; (b) PXRD patterns before and after N<sub>2</sub> and CO<sub>2</sub> adsorption/desorption test of Zn<sub>9</sub>O<sub>2</sub>(OH)<sub>2</sub>(L)<sub>6</sub>.

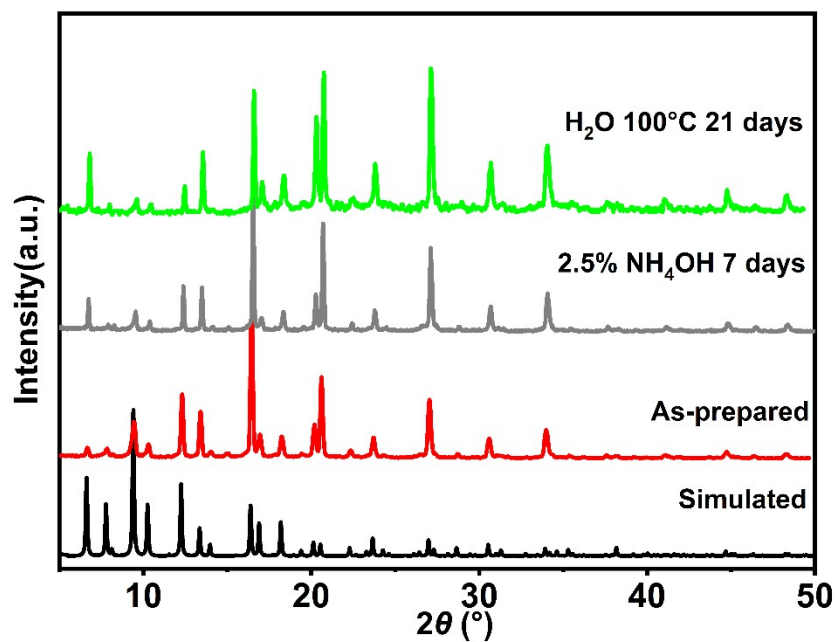

**Figure S8.** PXRD patterns of  $\text{Zn}_9\text{O}_2(\text{OH})_2(\text{L})_6$  after ammonia and boiling water treatments.

CA-113.95

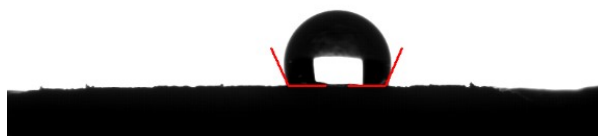

**Figure S9.** Test of the water contact angle of  $\text{Zn}_9\text{O}_2(\text{OH})_2(\text{L})_6$  (CA=113.95°).

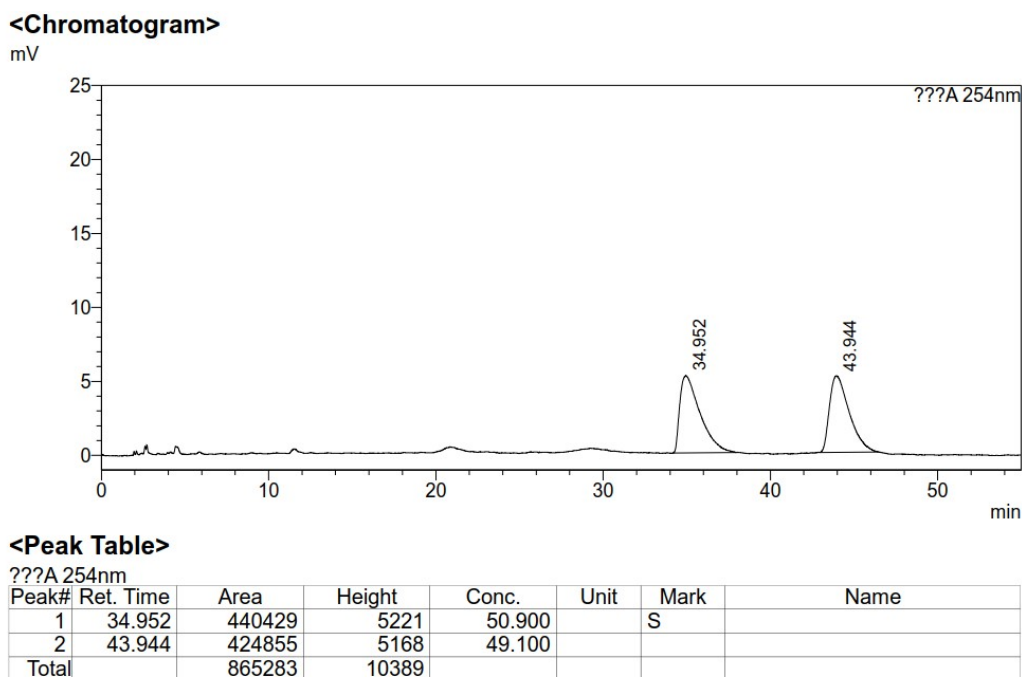

**Figure S10.** The ee test of styrene carbonate. HPLC analysis:0 ee. (Chiralcel OD-H, 2:98 *i*PrOH/Hexane, 1.0 ml/min, 40 °C, 254 nm)

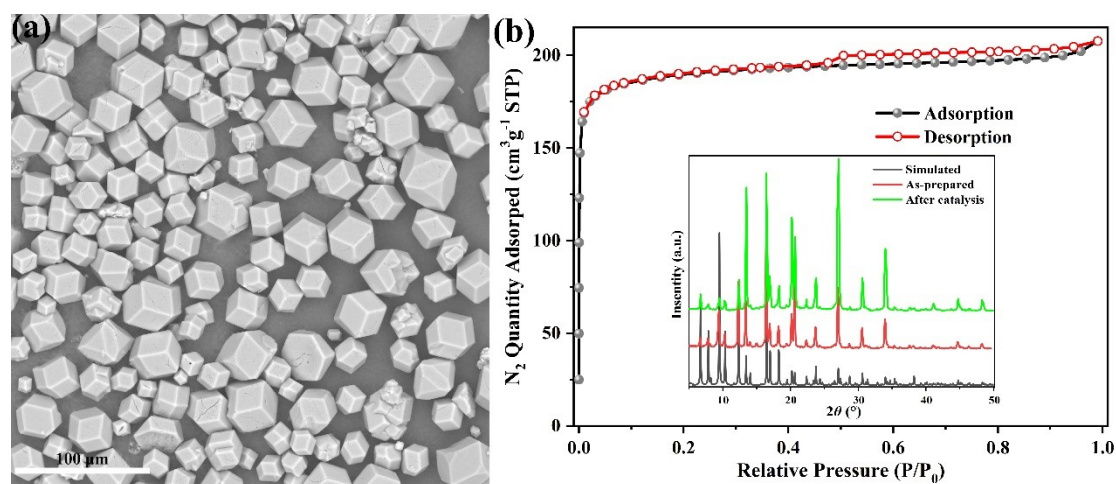

**Figure S11.** (a) SEM of MOF after catalysis; (b) N<sub>2</sub> adsorption/desorption test for MOF after catalysis (inset: PXRD patterns of MOF after catalysis)

**Table S2.** The content of Zn and Ni in different solutions after 210 days chemical stability experiments of  $Zn_9O_2(OH)_2(L)_6$ .

| $Zn_9O_2(OH)_2(L)_6$ | solution                       | Zn (mg/L) | Ni (mg/L) |
|----------------------|--------------------------------|-----------|-----------|
| 10 mg                | 2 M NaOH 1.5 ml                | 42.7      | 6.13      |
| 10 mg                | pH 2 HCl 1.5 ml                | 0.56      | 14.66     |
| 10 mg                | 2.5% NH <sub>4</sub> OH 1.5 ml | 27.8      | 1.42      |

**Table S3.** The chemical stability of pyrazolate-based MOFs in literature reports.

| MOF                                                                   | Chemical stability test                    | Reference        |
|-----------------------------------------------------------------------|--------------------------------------------|------------------|
| $\alpha$ -[Zn(BPEB)]                                                  | pH 6-8 (8 h)                               | 5                |
| BUT-31                                                                | BUT-31 is not stable in acidic conditions. | 6                |
| $Zn_3(BTP)_2 \cdot 4CH_3OH \cdot 2H_2O$                               | pH 14 (0.5 h)                              | 7                |
| NiBDP-NH <sub>2</sub>                                                 | pH = 13                                    | 8                |
| NiBDP-AgS                                                             | pH = 2-13                                  |                  |
| PCF-9                                                                 | pH = 3-12 (24 h)                           | 9                |
| NiL1                                                                  | pH 3 HCl, 10 M NaOH (24 h)                 | 10               |
| $[Ni_8(OH)_4(OH)_2(4,4'-(buta-1,3-diyne-1,4-diyl)bispyrazolato)_6]_n$ | pH = 2.3-12.80 (7 days)                    | 11               |
| PCN-601                                                               | 0.1 mM HCl s-NaOH (24 h)                   | 12               |
| PCN-602                                                               | pH 4-14 (24 h)                             | 2                |
| PCN-624                                                               | 1 M HCl (24 h)                             | 13               |
| BUT-32                                                                |                                            |                  |
| BUT-33                                                                | pH 3 HCl, 4 M NaOH (24 h)                  | 14               |
| BUT-48                                                                |                                            |                  |
| BUT-49                                                                | pH 5 HCl, 1 M NaOH (24 h)                  | 15               |
| BUT-123                                                               |                                            |                  |
| $Co_3(PCBA)_2(H_2O)_2$                                                | pH 3-12 (24 h)                             | 16               |
| $Zn_9O_2(OH)_2(L)_6$                                                  | pH 2-14 (210 days)                         | <b>this work</b> |

**Table S4.** CO<sub>2</sub> cycloaddition reactions with epoxide substrates of different sizes.

| Entry | Substrate                                                                           | Conversion (%) | Yield (%) |
|-------|-------------------------------------------------------------------------------------|----------------|-----------|
| 1     | 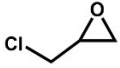 | 92             | 89        |
| 2     |  | 31             | 30        |
| 3     |  | 15             | 9         |

Reaction conditions: 1 mmol epoxides, 0.5 mol%  $Zn_9O_2(OH)_2(L)_6$  MOF, 0.5 mol% TBAB, 5 ml THF, 24 h, 80 °C, 7 atm. Yields were determined by <sup>1</sup>H NMR.

**Table S5.** Catalytic performances of  $\text{Zn}_9\text{O}_2(\text{OH})_2(\text{L})_6$  and other catalysts for the cycloaddition reaction of  $\text{CO}_2$  with cyclohexene oxide

| Catalysts                                                                                | co-catalysts                                         | Time (h) | T (°C) | P (atm) | Yield (%) | References       |
|------------------------------------------------------------------------------------------|------------------------------------------------------|----------|--------|---------|-----------|------------------|
| $\text{Zn}_4\text{Tb}_3\text{L}_4$<br>50 mol%                                            | TBAB<br>0.75 mmol%                                   | 8        | 120    | 10      | 37        | 17               |
| Ni(Salen)-MOF<br>0.5 mol%                                                                | TBAB<br>0.5 mol%                                     | 12       | 80     | 10      | 68        | 18               |
| SH4-Al(Cl)<br>0.25 mol%                                                                  | $[\text{ClC}_6\text{Im}][\text{HCO}_3]$<br>0.25 mol% | 24       | 80     | 10      | 73        | 19               |
| $\text{C}_{64}\text{H}_{52}\text{Ba}_3\text{N}_2\text{O}_{16}$<br>1 mol%                 | TBAB<br>10 mol%                                      | 4        | 80     | 1       | 68.1      | 20               |
| JLU-MOF58<br>0.1 mol%                                                                    | TBAB<br>5 mol%                                       | 24       | 80     | 1       | 92        | 21               |
| Al complex<br>0.1 mol%                                                                   | TBAB<br>1 mol%                                       | 18       | 70     | 10      | 61        | 22               |
| Zn-MOF-184<br>1.2 mol%                                                                   | TBAB<br>1.5 mol%                                     | 6        | 80     | 1       | 59        | 23               |
| Zn-MOF-74<br>1.2 mol%                                                                    | TBAB<br>1.5 mol%                                     | 6        | 80     | 1       | 38        | 23               |
| [Gd60]<br>7.5 mol%                                                                       | TBAB<br>2.5 mol%                                     | 12       | 60     | 1       | 38        | 24               |
| $\text{C}_{117}\text{H}_{160}\text{Zn}_2\text{Dy}_2\text{N}_9\text{O}_{28}$<br>0.01 mol% | TBAB<br>0.75 mol%                                    | 8        | 120    | 10      | 90        | 25               |
| $\text{Zn}_9\text{O}_2(\text{OH})_2(\text{L})_6$<br>1.5 mol%                             | TBAB<br>1.5 mol%                                     | 24       | 80     | 7       | 82        | <b>this work</b> |

## Reference

1. X. G. Guo, S. Qiu, X. Chen, Y. Gong and X. Sun, Postsynthesis Modification of a Metallosalen-Containing Metal-Organic Framework for Selective Th(IV)/Ln(III) Separation, *Inorg. Chem.*, 2017, **56**, 12357-12361.
2. X. L. Lv, K. Wang, B. Wang, J. Su, X. Zou, Y. Xie, J. R. Li and H. C. Zhou, A Base-Resistant Metalloporphyrin Metal-Organic Framework for C-H Bond Halogenation, *J. Am. Chem. Soc.*, 2017,

139, 211-217.

3. A. Spek, PLATON SQUEEZE: a tool for the calculation of the disordered solvent contribution to the calculated structure factors, *Acta Crystallographica Section C*, 2015, **71**, 9-18.
4. G. Sheldrick, Crystal structure refinement with SHELXL, *Acta Crystallographica Section C*, 2015, **71**, 3-8.
5. S. Galli, A. Maspero, C. Giacobbe, G. Palmisano, L. Nardo, A. Comotti, I. Bassanetti, P. Sozzani and N. Masciocchi, When long bis(pyrazolates) meet late transition metals: structure, stability and adsorption of metal-organic frameworks featuring large parallel channels, *J. Mater. Chem. A*, 2014, **2**, 12208-12221.
6. T. He, Y. Z. Zhang, B. Wang, X. L. Lv, L. H. Xie and J. R. Li, A Base-Resistant Zn(II) -Based Metal-Organic Framework: Synthesis, Structure, Postsynthetic Modification, and Gas Adsorption, *Chempluschem*, 2016, **81**, 864-871.
7. V. Colombo, S. Galli, H. J. Choi, G. D. Han, A. Maspero, G. Palmisano, N. Masciocchi and J. R. Long, High thermal and chemical stability in pyrazolate-bridged metal-organic frameworks with exposed metal sites, *Chem. Sci.*, 2011, **2**, 1311-1319.
8. H. Yang, X. Zhang, G. Zhang and H. Fei, An alkaline-resistant Ag(i)-anchored pyrazolate-based metal-organic framework for chemical fixation of CO<sub>2</sub>, *Chem. Commun.*, 2018, **54**, 4469-4472.

9. G. Huang, L. Yang, Q. Yin, Z. B. Fang, X. J. Hu, A. A. Zhang, J. Jiang, T. F. Liu and R. Cao, A Comparison of Two Isoreticular Metal-Organic Frameworks with Cationic and Neutral Skeletons: Stability, Mechanism, and Catalytic Activity, *Angew. Chem. Int. Ed.*, 2020, **59**, 4385-4390.
10. J. Hu, X. Deng, H. Zhang, Y. Diao, S. Cheng, S. L. Zheng, W. M. Liao, J. He and Z. Xu, Linker Deficiency, Aromatic Ring Fusion, and Electrocatalysis in a Porous Ni<sup>II</sup>-Pyrazolate Network, *Inorg. Chem.*, 2021, **60**, 161-166.
11. E. Q. Procopio, S. Rojas, N. M. Padial, S. Galli, N. Masciocchi, F. Linares, D. Miguel, J. E. Oltra, J. A. Navarro and E. Barea, Study of the incorporation and release of the non-conventional half-sandwich ruthenium(II) metallodrug RAPTA-C on a robust MOF, *Chem. Commun.*, 2011, **47**, 11751-11753.
12. K. Wang, X. L. Lv, D. Feng, J. Li, S. Chen, J. Sun, L. Song, Y. Xie, J. R. Li and H. C. Zhou, Pyrazolate-Based Porphyrinic Metal-Organic Framework with Extraordinary Base-Resistance, *J. Am. Chem. Soc.*, 2016, **138**, 914-919.
13. N. Huang, K. Wang, H. Drake, P. Cai, J. Pang, J. Li, S. Che, L. Huang, Q. Wang and H. C. Zhou, Tailor-Made Pyrazolide-Based Metal-Organic Frameworks for Selective Catalysis, *J. Am. Chem. Soc.*, 2018, **140**, 6383-6390.

14. T. He, Z. Huang, S. Yuan, X. L. Lv, X. J. Kong, X. Zou, H. C. Zhou and J. R. Li, Kinetically Controlled Reticular Assembly of a Chemically Stable Mesoporous Ni(II)-Pyrazolate Metal-Organic Framework, *J. Am. Chem. Soc.*, 2020, **142**, 13491-13499.
15. Y.-Z. Zhang, T. He, X.-J. Kong, Z.-X. Bian, X.-Q. Wu and J.-R. Li, Single-Crystal Synthesis and Structures of Highly Stable Ni8-Pyrazolate-Based Metal–Organic Frameworks, *ACS Materials Letters*, 2019, **1**, 20-24.
16. G. Si, X. Kong, T. He, W. Wu, L. Xie and J. Li, A stable Co(II)-based metal-organic framework with dual-functional pyrazolate-carboxylate ligand: Construction and CO<sub>2</sub> selective adsorption and fixation, *Chinese Chemical Letters*, 2021, **32**, 918-922.
17. L. Wang, C. Xu, Q. Han, X. Tang, P. Zhou, R. Zhang, G. Gao, B. Xu, W. Qin and W. Liu, Ambient chemical fixation of CO<sub>2</sub> using a highly efficient heterometallic helicate catalyst system, *Chem. Commun.*, 2018, **54**, 2212-2215.
18. Y. M. Fan, J. W. Li, Y. W. Ren and H. F. Jiang, A Ni(salen)-Based Metal-Organic Framework: Synthesis, Structure, and Catalytic Performance for CO<sub>2</sub> Cycloaddition with Epoxides, *Eur. J. Inorg. Chem.*, 2017, **2017**, 4982-4989.
19. B. Parmar, P. Patel, R. S. Pillai, R. I. Kureshy, N. U. Khan and E. Suresh, Efficient catalytic conversion of terminal/internal epoxides



- to cyclic carbonates by porous Co(ii) MOF under ambient conditions: structure-property correlation and computational studies, *J. Mater. Chem. A*, 2019, **7**, 2884-2894.
20. M. Wang, J. Liu, J. Jin, D. Wu, G. Yang, W.-Y. Zhang and Y.-Y. Wang, A new 3D luminescent Ba-organic framework with high open metal sites: CO<sub>2</sub> fixation, luminescence sensing, and dye sorption, *CrystEngComm*, 2021, **23**, 663-670.
  21. X. Sun, J. Gu, Y. Yuan, C. Yu, J. Li, H. Shan, G. Li and Y. Liu, A Stable Mesoporous Zr-Based Metal Organic Framework for Highly Efficient CO<sub>2</sub> Conversion, *Inorg. Chem.*, 2019, **58**, 7480-7487.
  22. C. J. Whiteoak, N. Kielland, V. Laserna, E. C. Escudero-Adan, E. Martin and A. W. Kleij, A powerful aluminum catalyst for the synthesis of highly functional organic carbonates, *J. Am. Chem. Soc.*, 2013, **135**, 1228-1231.
  23. Y. B. N. Tran, P. T. K. Nguyen, Q. T. Luong and K. D. Nguyen, Series of M-MOF-184 (M = Mg, Co, Ni, Zn, Cu, Fe) Metal-Organic Frameworks for Catalysis Cycloaddition of CO<sub>2</sub>, *Inorg. Chem.*, 2020, **59**, 16747-16759.
  24. J. Dong, P. Cui, P. F. Shi, P. Cheng and B. Zhao, Ultrastrong Alkali-Resisting Lanthanide-Zeolites Assembled by [Ln<sub>60</sub>] Nanocages, *J. Am. Chem. Soc.*, 2015, **137**, 15988-15991.
  25. L. G. Wang, H. Q. Li, S. M. Xin, P. He, Y. Cao, F. J. Li and X. J.

Hou, Highly efficient synthesis of diethyl carbonate via one-pot reaction from carbon dioxide, epoxides and ethanol over KI-based binary catalyst system, *Appl. Catal. A - Gen.*, 2014, **471**, 19-27.
